# Supplementary material for: Exploring Heat Stress Relief Measures among the Australian Labour Force
Source: MDPI journal article supplement (doi:10.3390/ijerph15030401), 2018-02-26
Supplement: s1 [file s1]

## Supplementary materials

**Table S1.** Number of invited survey participants, drop-out and response rates for the two survey waves in May (Wave 1) and October 2014 (Wave 2).

| Survey Responses    | Total | Wave 1 | Wave 2 |
|---------------------|-------|--------|--------|
| Invited respondents | 9405  | 4912   | 4493   |
| Started survey (%)  | 2087  | 871    | 1216   |
| Dropped-out (%)     | 210   | 72     | 138    |
| Excluded (%)        | 158   | 51     | 107    |
| Final sample        | 1719  | 748    | 971    |
| Response rate       | 18.3% | 15.2%  | 21.6%  |

**Table S2.** Variables included in logit models as determinants of heat relief measures.

| Category          | Variables                                        | Coding                                                                                                                                                                                                                                        |
|-------------------|--------------------------------------------------|-----------------------------------------------------------------------------------------------------------------------------------------------------------------------------------------------------------------------------------------------|
| Heat stress       | Heat stress                                      | 3 variables, dummy coded:<br>- rarely<br>- sometimes<br>- often/very often                                                                                                                                                                    |
|                   | Workload                                         | Dummy coded: full-time (1) / casual or part-time (0)                                                                                                                                                                                          |
| Workplace         | Time spent outside while working                 | 1 variable coded from 0 to 4:<br>- Almost no time (0)<br>- About a quarter of work time (1)<br>- About half of work time (2)<br>- About three-quarters of work time (3)<br>- Almost all time (4)                                              |
|                   | Physical exertion                                | 1 variable coded from 1 (very low) to 10 (very high)                                                                                                                                                                                          |
|                   | Satisfaction with heat relief management at work | 4 variables, dummy coded:<br>- handled well<br>- handled ok<br>- handled poorly<br>- no need for heat management at work                                                                                                                      |
|                   |                                                  |                                                                                                                                                                                                                                               |
| Environment       | Location (State/Territory)                       | 8 variables, dummy coded:<br>- Victoria (VIC)<br>- New South Wales (NSW)<br>- Queensland (QLD)<br>- South Australia (SA)<br>- Western Australia (WA)<br>- Tasmania (TAS)<br>- Australian Capital Territory (ACT)<br>- Northern Territory (NT) |
|                   |                                                  |                                                                                                                                                                                                                                               |
| Control variables | Age                                              | continuous                                                                                                                                                                                                                                    |
|                   | Income                                           | continuous                                                                                                                                                                                                                                    |
|                   | Gender                                           | Dummy coded: male (1) / female (0)                                                                                                                                                                                                            |
|                   | Level of education                               | 5 variables, dummy coded:<br>- University degree<br>- Certificate/Diploma<br>- Completed high school<br>- Completed Years 11 or 10<br>- Year 9 or below                                                                                       |
|                   | Health status                                    | Dummy coded: poor health (1) / good health (0)                                                                                                                                                                                                |
|                   |                                                  |                                                                                                                                                                                                                                               |

Note: All perception variables were coded: 1 (Strongly disagree), 2 (Disagree), 3 (Agree), 4 (Strongly agree) to the respective statements.

**Table S3.** Differences in core demographics and heat relief measures of respondents in survey wave 1 and wave 2.

| <b>Sample Characteristics</b>                                | <b>Wave 1</b>          | <b>Wave 2</b>          | <b>Difference</b>           |
|--------------------------------------------------------------|------------------------|------------------------|-----------------------------|
| Number of respondents                                        | 748                    | 971                    |                             |
| Male (%) <sup>*</sup>                                        | 381 (50.9%)            | 522 (53.8%)            | $\chi^2 = 1.351; p = 0.245$ |
| Age (years)                                                  | 40.5<br>(SD: 12.5)     | 40.6<br>(SD: 11.9)     | $F = 0.070; p = 0.791$      |
| Income (Mean)                                                | 61,630<br>(SD: 78,898) | 60,769<br>(SD: 76,863) | $F = 0.052; p = 0.820$      |
| Stressed by heat                                             | 557 (74.5%)            | 728 (75.0%)            | $\chi^2 = 0.058; p = 0.810$ |
| Work full-time                                               | 450 (60.1%)            | 605 (62.3%)            | $\chi^2 = 0.821; p = 0.365$ |
| Cooling                                                      | 369 (66.2%)            | 486 (66.8%)            | $\chi^2 = 0.037; p = 0.848$ |
| Resting                                                      | 241 (43.3%)            | 327 (44.9%)            | $\chi^2 = 0.348; p = 0.555$ |
| Drinking                                                     | 473 (84.9%)            | 657 (90.3%)            | $\chi^2 = 8.445; p = 0.004$ |
| Thought that heat relief management at work was handled well | 221 (39.7%)            | 305 (41.9%)            | $\chi^2 = 0.932; p = 0.334$ |

Note: <sup>\*</sup> Exactly the same numbers of female and male respondents were invited; it happened that more men choose to participate in the survey during wave 2.

**Table S4.** Correlation matrix of independent variables regarding demographic and employment background, and heat stress (as described in Table S2).

| <u>Sample Characteristics</u>     | Time Spent<br>Outside | Physical<br>Exertion | Age   | Income | Male  | University<br>Degree | Poor<br>Health | Sometimes<br>Heat Stressed | Often or very<br>often Heat<br>Stressed |
|-----------------------------------|-----------------------|----------------------|-------|--------|-------|----------------------|----------------|----------------------------|-----------------------------------------|
| Fulltime employment               | -0.013                | -0.067               | 0.049 | 0.284  | 0.277 | 0.083                | -0.080         | -0.064                     | 0.036                                   |
| Time spent outside                | 1                     | 0.339                | 0.095 | -0.005 | 0.188 | -0.142               | 0.042          | 0.107                      | 0.095                                   |
| Physical exertion                 |                       | 1                    | 0.025 | -0.085 | 0.046 | -0.146               | -0.001         | 0.095                      | 0.231                                   |
| Age                               |                       |                      | 1     | 0.094  | 0.079 | -0.155               | 0.047          | 0.023                      | -0.014                                  |
| Income                            |                       |                      |       | 1      | 0.153 | 0.089                | -0.048         | -0.021                     | -0.014                                  |
| Male                              |                       |                      |       |        | 1     | -0.017               | -0.019         | 0.004                      | -0.004                                  |
| University degree                 |                       |                      |       |        |       | 1                    | -0.055         | -0.053                     | -0.013                                  |
| Poor health                       |                       |                      |       |        |       |                      | 1              | 0.023                      | 0.087                                   |
| Sometimes heat stressed           |                       |                      |       |        |       |                      |                | 1                          | -0.297                                  |
| Often or very often heat stressed |                       |                      |       |        |       |                      |                |                            | 1                                       |

**Table S5.** Results of saturated logit models with interactions between core demography variables—Hydration.

| Variables                         | Coefficient | Standard Error | p-Value |
|-----------------------------------|-------------|----------------|---------|
| Constant                          | 1.986       | 0.458          | <0.0001 |
| Age                               | -0.007      | 0.007          | 0.3618  |
| Poor Health                       | 7.272       | 5.725          | 0.2040  |
| Age * Poor Health                 | -0.118      | 0.103          | 0.2535  |
| Physical exertion                 | 0.094       | 0.054          | 0.0845  |
| Male                              | -0.036      | 0.372          | 0.9237  |
| Physical exertion * Male          | -0.103      | 0.069          | 0.1339  |
| Time working outside              | 0.076       | 0.079          | 0.3338  |
| University degree                 | -0.003      | 0.197          | 0.9868  |
| Fulltime                          | -0.219      | 0.213          | 0.3032  |
| Income                            | 0.004       | 0.003          | 0.1517  |
| Sometimes heat stressed           | 0.014       | 0.204          | 0.9454  |
| Often or very often heat stressed | -0.396      | 0.231          | 0.0872  |

Note: \* = indicating interaction between the two variables, the symbol “\*\*”.

**Table S6.** Results of saturated logit models with interactions between core demography variables—Cooling.

| Variables                         | Coefficient | Standard Error | p-Value |
|-----------------------------------|-------------|----------------|---------|
| Constant                          | 0.916       | 0.314          | 0.0035  |
| Age                               | 0.0002      | 0.005          | 0.9663  |
| Poor Health                       | 1.618       | 2.060          | 0.4321  |
| Age * Poor Health                 | 0.003       | 0.044          | 0.9396  |
| Physical exertion                 | -0.100      | 0.034          | 0.0037  |
| Male                              | -0.082      | 0.275          | 0.7646  |
| Physical exertion * Male          | 0.006       | 0.047          | 0.9064  |
| Time working outside              | -0.056      | 0.052          | 0.2855  |
| University degree                 | 0.374       | 0.133          | 0.0048  |
| Fulltime                          | 0.006       | 0.136          | 0.9671  |
| Income (in thousands'000)         | 0.001       | 0.001          | 0.4134  |
| Sometimes heat stressed           | 0.128       | 0.139          | 0.3577  |
| Often or very often heat stressed | 0.016       | 0.167          | 0.9240  |

Note: Please confirm whether "000" is correct. A\* = indicating interaction between the two variables, and add the explanation for the symbol "§".

**Table S7.** Results of saturated logit models with interactions between core demography variables—Resting.

| Variables                          | Coefficient | Standard Error | p-Value |
|------------------------------------|-------------|----------------|---------|
| Constant                           | -1.321      | 0.310          | <0.0001 |
| Age                                | -0.007      | 0.005          | 0.1696  |
| Poor Health                        | -0.171      | 1.266          | 0.8927  |
| Age * Poor Health                  | 0.020       | 0.027          | 0.4714  |
| Physical exertion                  | 0.105       | 0.034          | 0.0018  |
| Male                               | 0.559       | 0.260          | 0.0315  |
| Physical exertion * Male           | -0.009      | 0.045          | 0.8421  |
| Time working outside               | 0.116       | 0.051          | 0.0247  |
| University degree                  | 0.267       | 0.131          | 0.0422  |
| Fulltime                           | -0.194      | 0.130          | 0.1366  |
| Income ( <del>in thousands</del> ) | 0.001       | 0.001          | 0.1057  |
| Sometimes heat stressed            | 0.318       | 0.133          | 0.0171  |
| Often or very often heat stressed  | 0.145       | 0.162          | 0.3704  |

\* = indicating interaction between the two variables.

Table S8. Results of saturated logit models with interactions between core demography variables—Changing job.

| Variables                         | Coefficient | Standard Error | p-Value |
|-----------------------------------|-------------|----------------|---------|
| Constant                          | -3.153      | 0.621          | <0.0001 |
| Age                               | -0.023      | 0.009          | 0.0122  |
| Poor Health                       | -0.236      | 1.618          | 0.8843  |
| Age * Poor Health                 | 0.024       | 0.035          | 0.5000  |
| Physical exertion                 | 0.055       | 0.064          | 0.3890  |
| Male                              | -0.381      | 0.554          | 0.4908  |
| Physical exertion * Male          | 0.188       | 0.086          | 0.0290  |
| Time working outside              | -0.032      | 0.084          | 0.7057  |
| University degree                 | 0.175       | 0.234          | 0.4555  |
| Fulltime                          | -0.489      | 0.242          | 0.0433  |
| Income (in thousands'000)         | -0.002      | 0.002          | 0.3478  |
| Sometimes heat stressed           | 1.132       | 0.367          | 0.0020  |
| Often or very often heat stressed | 2.494       | 0.357          | <0.0001 |

\* = indicating interaction between the two variables.



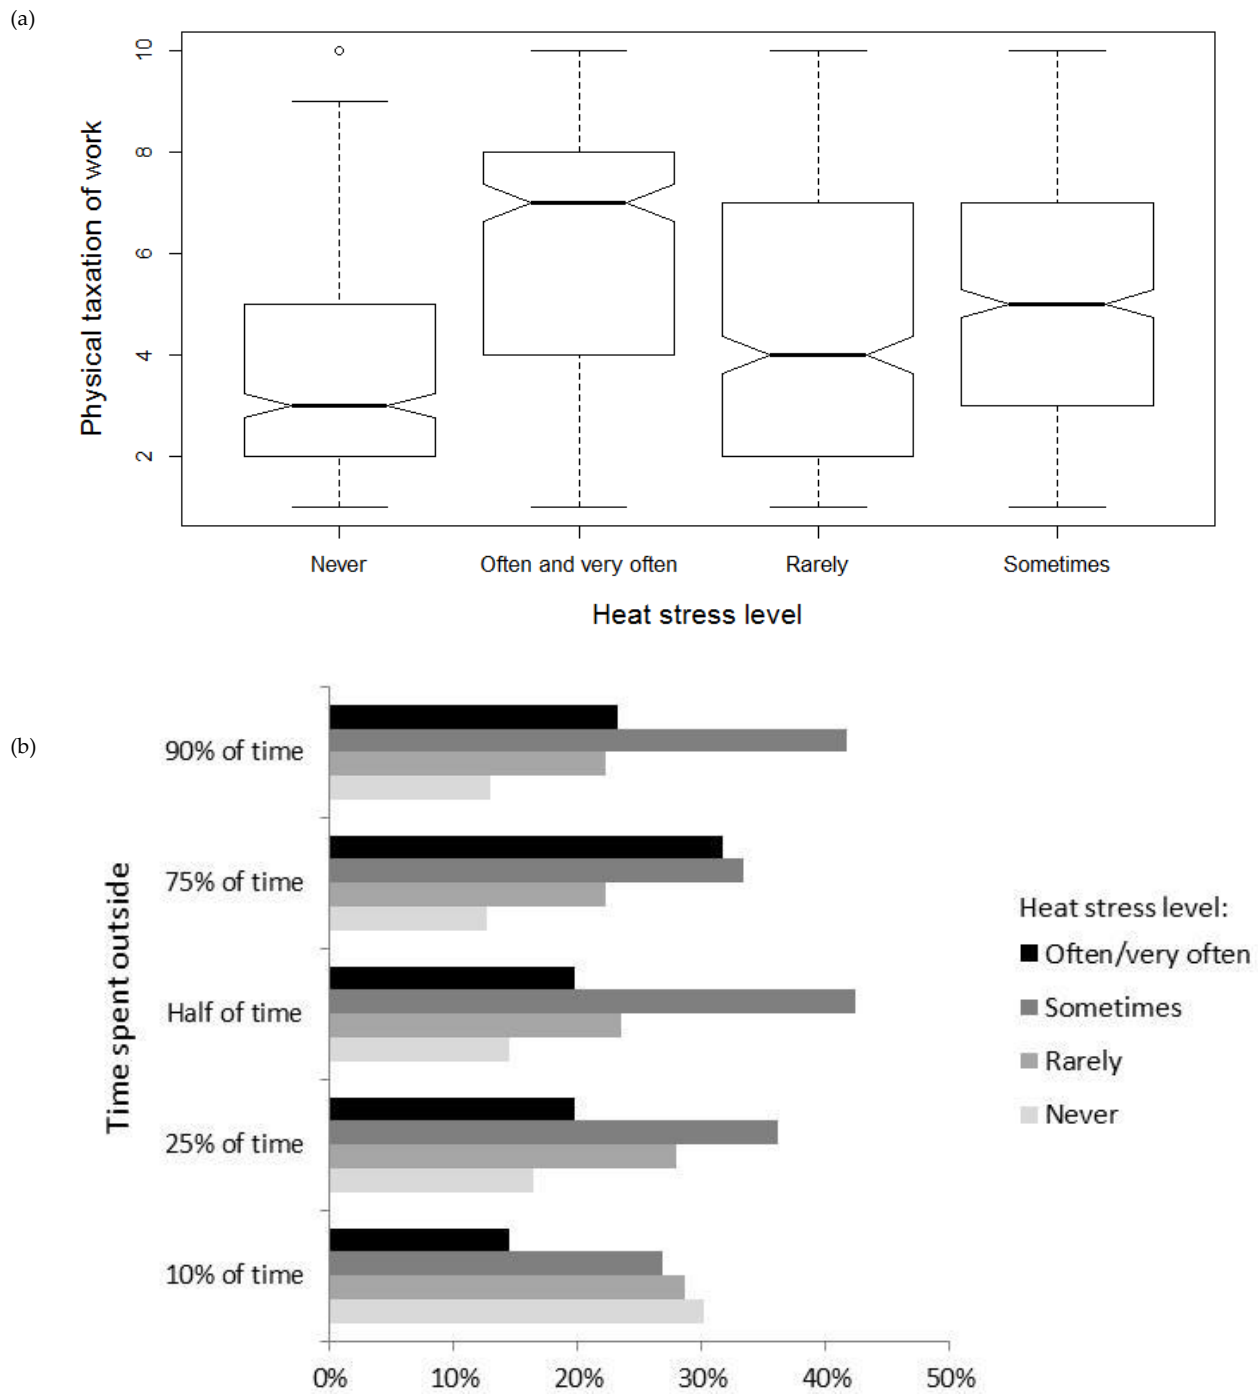

**Figure S1.** The impacts of physical exertion of work (a) and time spent outside (b) and on respondents' heat stress levels (N = 1719).  
 (Please explain the different colour in Figure S1a, such as: red, grey):

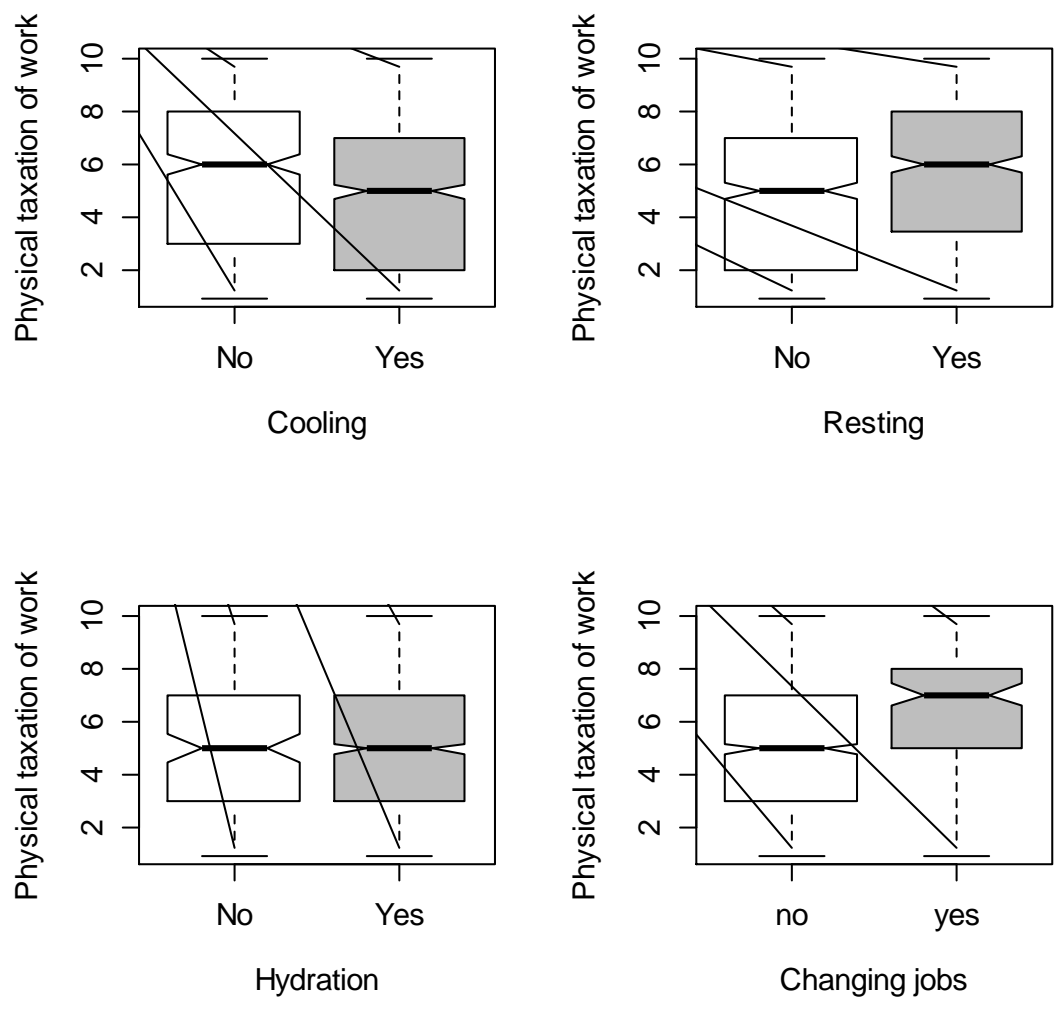

Figure S2. Heat relief measures taken by heat stressed respondents (N = 1719) at work by their levels of physical exertion at work.
